# Supplementary material
Source: Royal Society of Chemistry journal article supplement (doi:10.1039/d5ma01417d)
Supplement: d5ma01417d1.pdf [file d5ma01417d1.pdf]

## Supporting Information

# Biocompatible melanin-functionalized CaCO<sub>3</sub> nanoparticles for cells protection against photoinduced oxidative stress

*Giuseppe Vitiello<sup>a,b,†</sup>, Francesca Baldassarre<sup>c</sup>, Chiara Boncristiani<sup>d,e</sup>, Alessandro Pezzella<sup>f,g</sup>,  
Giuseppina Luciani<sup>a</sup>, Giuseppe Ciccarella<sup>c,d</sup> and Viviana Vergaro<sup>e,†</sup>*

<sup>a</sup> Department of Chemical, Materials and Production Engineering, University of Naples Federico II, p.le V. Tecchio 80, 80125 Naples, Italy.

<sup>b</sup> Center for Colloid and Surface Science, CSGI, Via della Lastruccia 3, 50019, Florence, Italy.

<sup>c</sup> Biological and Environmental Sciences Department, UdR INSTM of Lecce University of Salento, Via Monteroni, 73100 Lecce, Italy.

<sup>d</sup> Institute of Nanotechnology CNR NANOTEC, Consiglio Nazionale delle Ricerche, Via Monteroni, 73100 Lecce, Italy.

<sup>e</sup> Department of Experimental Medicine, University of Salento, Via Monteroni, 73100 Lecce, Italy.

<sup>f</sup> Department of Physics “Ettore Pancini”, University of Naples Federico II, via Cintia 4, 80126 Naples, Italy.

<sup>g</sup> Institute of Polymers, Composites and Biomaterials, National Research Council, 80125 Naples, Italy.

† Corresponding authors: Giuseppe Vitiello ([giuseppe.vitiello@unina.it](mailto:giuseppe.vitiello@unina.it)), Viviana Vergaro ([viviana.vergaro@unisalento.it](mailto:viviana.vergaro@unisalento.it))

## Table of concept

|                                                                                                   |    |
|---------------------------------------------------------------------------------------------------|----|
| 1. CaCO <sub>3</sub> NPs TEM characterization .....                                               | S1 |
| 2. Stability characterization .....                                                               | S2 |
| 3. Confocal micrographs: orthogonal projection image.....                                         | S3 |
| 4. Quantification of internalized Melanin-CaCO <sub>3</sub> NPs recording the UV-vis spectra..... | S4 |
| 5. TG and DTA curves of bare CaCO <sub>3</sub> NC and melanin-CaCO <sub>3</sub> NPs.....          | S5 |
| 6. FTIR spectra of bare CaCO <sub>3</sub> and melanin-CaCO <sub>3</sub> NPs.....                  | S6 |

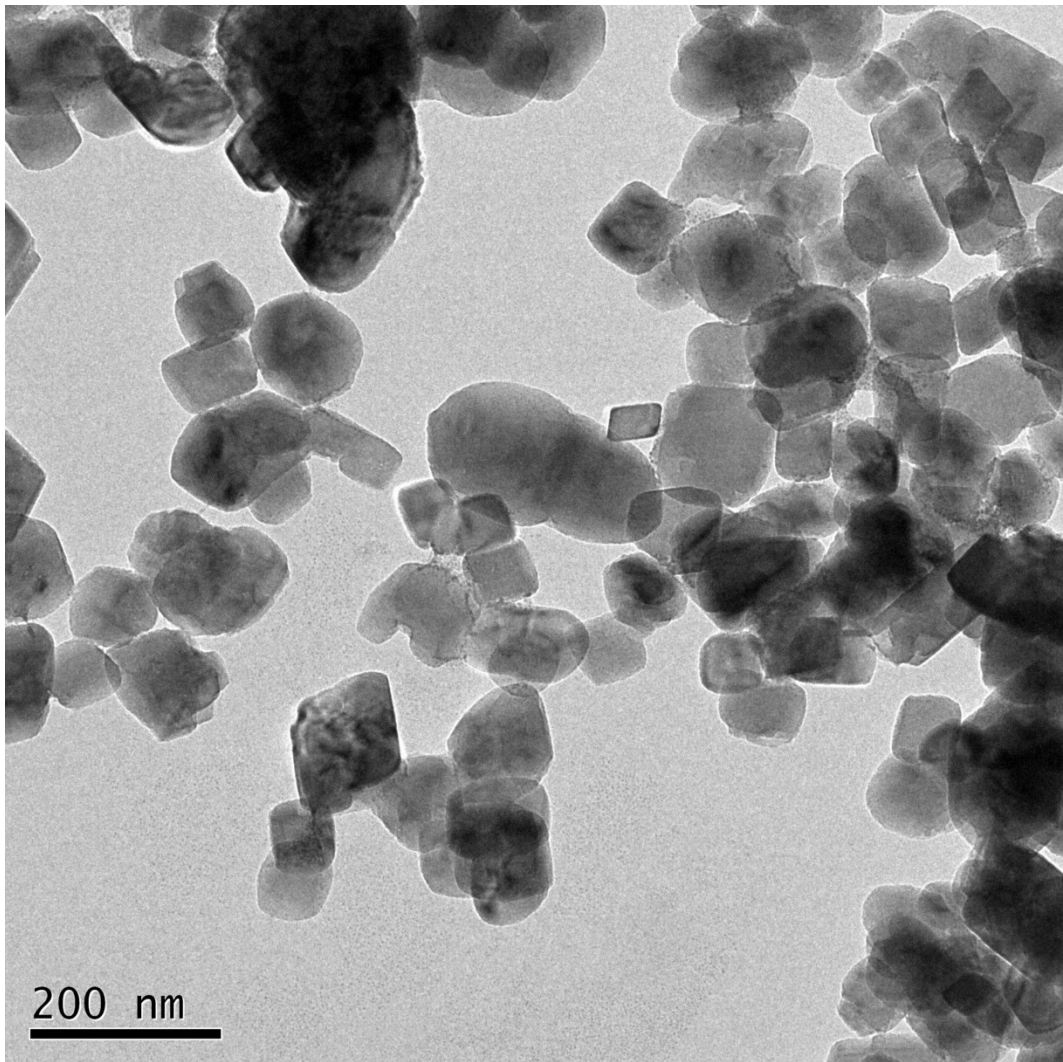

**Figure S1.** TEM image of CaCO<sub>3</sub> NPs. Scale bar 200 nm.

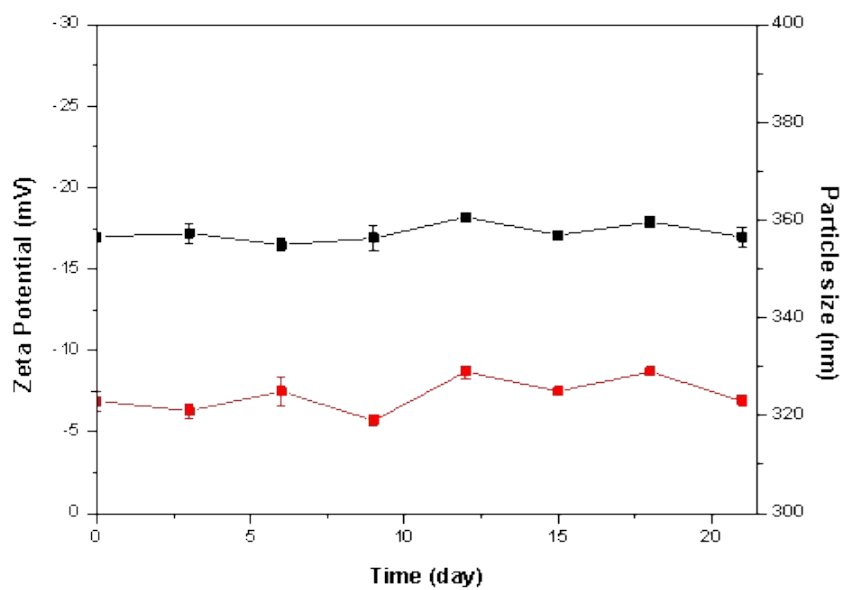

**Figure S2.** Stability characterization: Size (red line) and zeta potential (black line) measurements during 21 days.

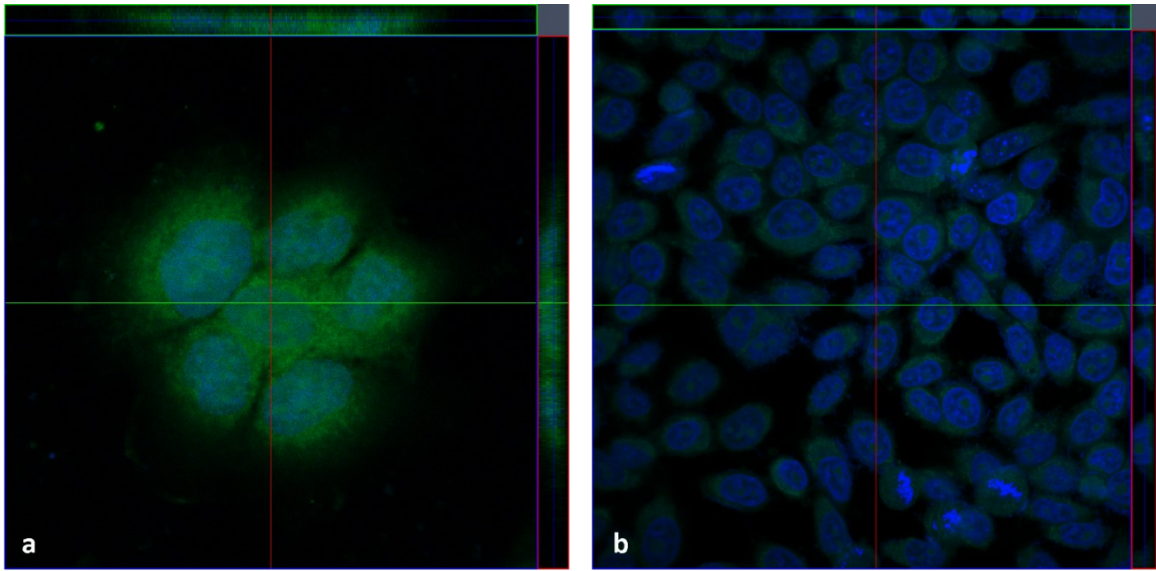

**Figure S3.** Orthogonal projection image of HaCaT (a) and WS1 (b) to confirm the internalization of melanin – CaCO<sub>3</sub> NPs.

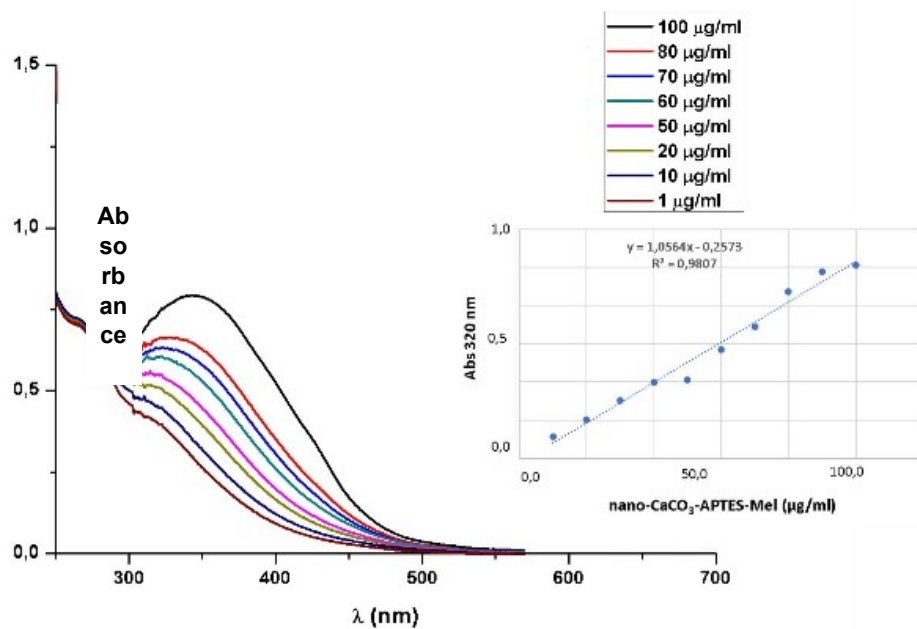

**Figure S4.** Quantification of internalized Melanin-CaCO<sub>3</sub> NPs recording the UV-vis spectra. Increasing concentrations (1–100 μg/mL) of Melanin-CaCO<sub>3</sub> NPs were used to build the calibration curves by plotting values of absorbance at 330 nm against Melanin-CaCO<sub>3</sub> NPs concentration.

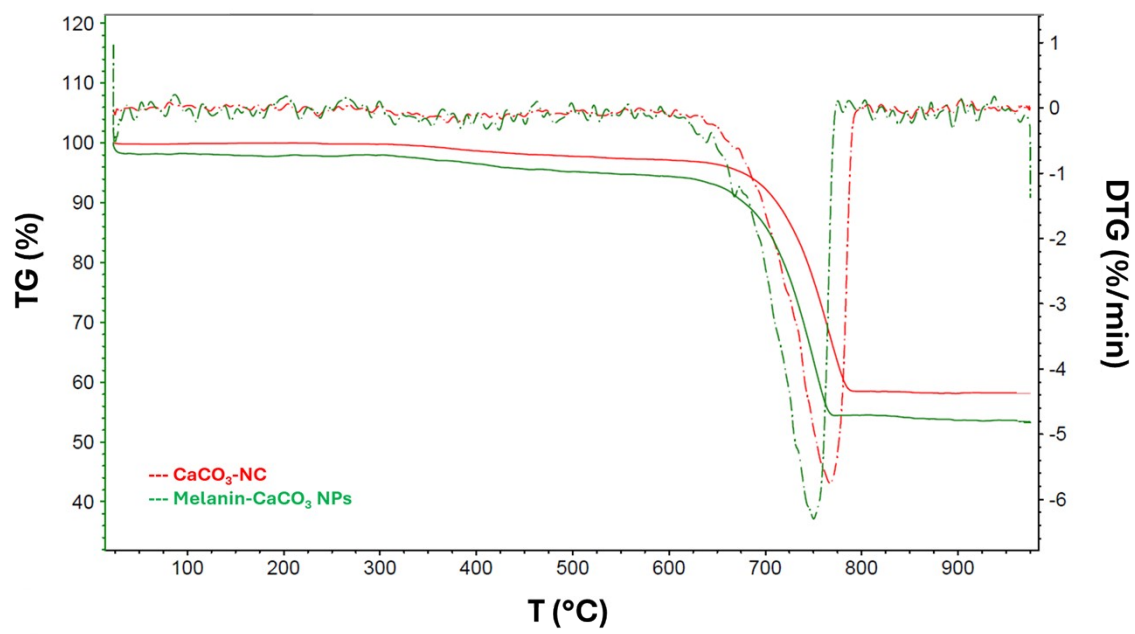

**Figure S5** - TG and DTA curves of bare  $\text{CaCO}_3$  NC (red line) and melanin- $\text{CaCO}_3$  NPs (green line).

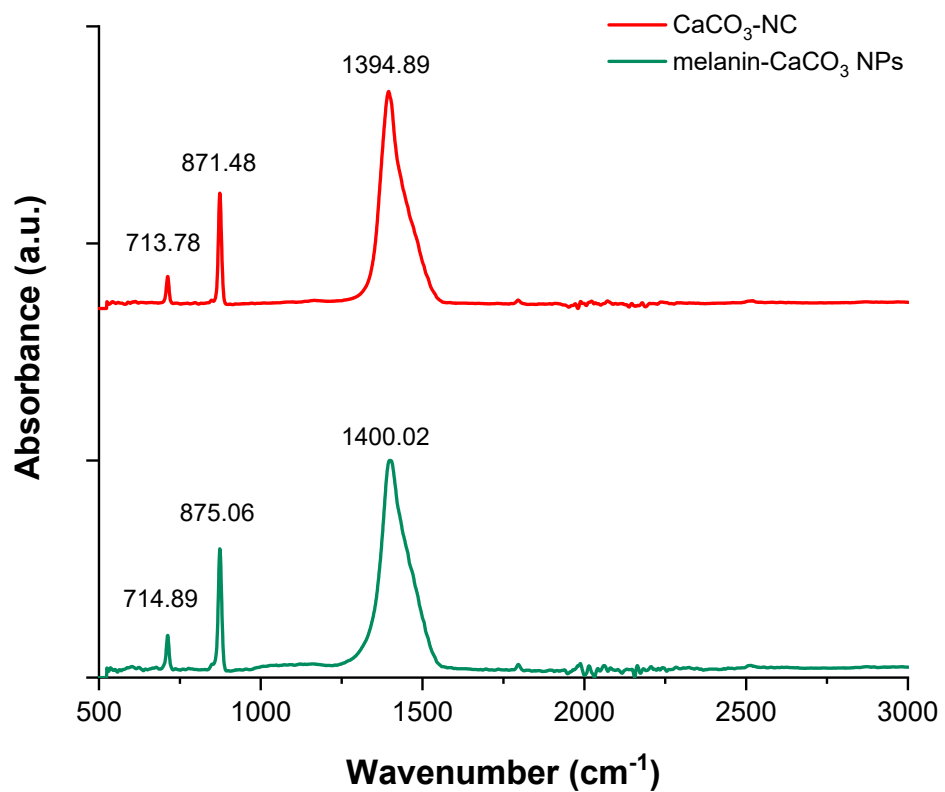

**Figure S6** – FTIR spectra of bare CaCO<sub>3</sub> NC (red line) and melanin-CaCO<sub>3</sub> NPs (green line).
